# Supplementary material for: A Promotion Role of MIR31 in the Process of Vocal Fold Wound Healing
Source: Hindawi journal article supplement (doi:10.1155/2023/4672827), 2023-08-08
Supplement: f1 [file 4672827.f1.pdf]

| Name                                                                        | GO ID    |
|-----------------------------------------------------------------------------|----------|
| GO: collagen trimer                                                         | 0005581; |
| GO: extracellular matrix organization                                       | 0030198; |
| GO: extracellular structure organization                                    | 0043062; |
| GO: negative regulation of endodermal cell differentiation                  | 1903225; |
| GO: collagen type V trimer                                                  | 0005588; |
| GO: extracellular matrix structural constituent conferring tensile strength | 0030020; |
| GO: collagen fibril organization                                            | 0030199; |
| GO: regulation of endodermal cell differentiation                           | 1903224; |
| GO: negative regulation of gastrulation                                     | 2000542; |
| GO: collagen-containing extracellular matrix                                | 0062023; |
| GO: collagen biosynthetic process                                           | 0032964; |

| # of Entities | Overlap | Overlapping Genes                   | p-value | p-value_beforeFDR |
|---------------|---------|-------------------------------------|---------|-------------------|
| 100           | 4       | C1QTNF2;COL5A1;COL5A2;COL6A2        | 0.0068  | 1.696E-07         |
| 411           | 5       | HTRA1;SERPINH1;COL5A1;COL5A2;COL6A2 | 0.01191 | 9.479E-07         |
| 412           | 5       | HTRA1;SERPINH1;COL5A1;COL5A2;COL6A2 | 0.01191 | 9.593E-07         |
| 4             | 2       | COL5A1;COL5A2                       | 0.01191 | 1.328E-06         |
| 4             | 2       | COL5A1;COL5A2                       | 0.01191 | 1.506E-06         |
| 43            | 3       | COL5A1;COL5A2;COL6A2                | 0.01191 | 1.781E-06         |
| 58            | 3       | SERPINH1;COL5A1;COL5A2              | 0.01579 | 2.756E-06         |
| 6             | 2       | COL5A1;COL5A2                       | 0.01663 | 3.318E-06         |
| 7             | 2       | COL5A1;COL5A2                       | 0.02057 | 4.644E-06         |
| 538           | 5       | HTRA1;SERPINH1;COL5A1;COL5A2;COL6A2 | 0.02057 | 5.128E-06         |
| 9             | 2       | SERPINH1;COL5A1                     | 0.02901 | 7.956E-06         |
